# Supplementary material for: Dietary Long-Chain n-3 Polyunsaturated Fatty Acid Supplementation Alters Electrophysiological Properties in the Nucleus Accumbens and Emotional Behavior in Naïve and Chronically Stressed Mice
Source: MDPI journal article supplement (doi:10.3390/ijms23126650), 2022-06-14
Supplement: s1 [file s1]

**Table S1:** Statistical tests performed in the present study. n/a: non-applicable, ANOVA: analysis of variation, RM: repeated measures, p values are encoded as following: \* p<0.05, \*\* p<0.01 and \*\*\* p<0.001.

**Table S2:** Genes used for mRNA microarray. Gene names, aliases and functions are presented.

| Gene name | Full name                                              | Other name(s) in <i>mus musculus</i>                      | Protein function |
|-----------|--------------------------------------------------------|-----------------------------------------------------------|------------------|
| Alox5     | Arachidonate 5-lipoxygenase                            | 5-LO, 5-LOX, 5LO, 5LX, AI850497, F730011J02               | Lipoxygenase     |
| Alox8     | Arachidonate 8-lipoxygenase                            | 15-LOX-2, 15-LOX-B, 8-LOX, 8S-LOX, Alox15b                |                  |
| Alox15    | Arachidonate 15-lipoxygenase                           | 12-LOX, 15-LOX, 15-LOX-1, LOG15                           |                  |
| Abhd4     | Abhydrolase domain containing 4                        | 1110035H23Rik, AI429574, Abh4                             | Hydrolase        |
| Abhd6     | Abhydrolase domain containing 6                        | 0610041D24Rik, AA673485, AV065425                         |                  |
| Abhd12    | Abhydrolase domain containing 12                       | 1500011G07Rik, 6330583M11Rik, AI431047, AW547313          |                  |
| Acaa1a    | Acetyl-Coenzyme A acyltransferase 1A                   | Acaa, Acaa1, D9Ert25e, PTL                                | Transferase      |
| Acaca     | Acetyl-Coenzyme A carboxylase alpha                    | A530025K05Rik, Acac, Acc1, Gm738                          | Carboxylase      |
| Acadl     | Acyl-Coenzyme A dehydrogenase, long-chain              | AA960361, AU018452, C79855, LCAD                          | Dehydrogenase    |
| Acadv1    | Acyl-Coenzyme A dehydrogenase, very long chain         | vlcad                                                     |                  |
| Acat1     | Acetyl-Coenzyme A acetyltransferase 1                  | 6330585C21Rik, Acat                                       | Transferase      |
| Acox1     | Acyl-Coenzyme A oxidase 1                              | AOX, Acox, D130055E20Rik, Paox                            | Oxidase          |
| Acs11     | Acyl-CoA synthetase long-chain family member 1         | Acas, Acas1, Acs, FACS, Facl2, LACS 1, LACS1              | Ligase           |
| Actb      | Actin, beta                                            | Actx, E430023M04Rik, beta-actin                           | Housekeeping     |
| Adipor1   | Adiponectin receptor 1                                 | 2810031L11Rik, ACDCR1, CGI-45, Paqr1                      | Receptor         |
| Adipor2   | Adiponectin receptor 2                                 | 1110001I14Rik, ADCR2, AI115388, AW554121, D6Ucla1e, Paqr2 |                  |
| ApoE      | Apolipoprotein E                                       | AI255918, Apo-E                                           | Transporter      |
| Cnr1      | Cannabinoid receptor 1                                 | CB1, CB-R, CB1A, CB1B, CB1R                               | Receptor         |
| Cnr2      | Cannabinoid receptor 2                                 | CB2, CB-2, CB2-R                                          |                  |
| Cd36      | CD36 molecule                                          | FAT, GPIV, Scarb3                                         | Protein          |
| Cmklr1    | Chemokine-like receptor 1                              | ChemR23, DEZ, Gpcr27, mcmklr1                             | Receptor         |
| Cpla2     | Phospholipase A2, group IVA                            | Pla2g4, cPLA2, cPLA2-alpha, cPLA2alpha                    | Lipase           |
| Cs        | Citrate synthase                                       | 2610511A05Rik, 9030605P22Rik, Ahl4, BB234005, Cis         | Synthase         |
| Cyp27a1   | Cytochrome P450, family 27, subfamily a, polypeptide 1 | 1300013A03Rik, Cyp27                                      | Monooxygenase    |
| Dagla     | Diacylglycerol lipase, alpha                           | Nsddr                                                     | Lipase           |
| Elovl1    | Elongation of very long chain fatty acids-like 1       | Ssc1, AA407424, BB151133                                  | Elongase         |
| Elovl2    | Elongation of very long chain fatty acids-like 2       | Ssc2, AI317360                                            |                  |
| Elovl4    | Elongation of very long chain fatty acids-like 4       |                                                           |                  |
| Elovl5    | ELOVL family member 5                                  | HELO1, AI747313, AU043003, 1110059L23Rik                  |                  |
| Enpp2     | Diacylglycerol lipase, alpha                           | Nsddr                                                     | Lipase           |
| Faah      | Fatty acid amide hydrolase                             | AW412498                                                  | Hydrolase        |
| Fabp7     | Fatty acid binding protein 7                           | MRG, Blbp, BFABP, B-FABP                                  | Binder           |
| Fads1     | Fatty acid desaturase 1                                | DSD, AI317215, 0710001O03Rik, A930006B21Rik               | Desaturase       |
| Fads2     | Fatty acid desaturase 2                                | Fads2, Fadsd2, 2900042M13Rik                              |                  |
| Fasn      | Fatty acid synthase                                    | FAS, A630082H08Rik                                        | Synthase         |
| Fpr2      | Formyl peptide receptor 2                              | E330010I07Rik, Fpr-rs2                                    | Receptor         |
| Gapdh     | Glyceraldehyde-3-phosphate dehydrogenase               | Gapd                                                      | Dehydrogenase    |
| Gnpat     | Glyceronephosphate O-acyltransferase                   | AU019525, D1Ert819e, DHAPAT                               | Transferase      |
| Gpr18     | G protein-coupled receptor 18                          |                                                           | Receptor         |

|          |                                                                         |                                                                                 |               |
|----------|-------------------------------------------------------------------------|---------------------------------------------------------------------------------|---------------|
| Gpr31b   | G protein-coupled receptor 31                                           | 12-HETER, GPR31c(t), Gpr31, Gpr31c                                              |               |
| Gpr55    | G protein-coupled receptor 55                                           | CTLF, Gm218, Lpir1                                                              |               |
| Hadh     | Hydroxyacyl-Coenzyme A dehydrogenase                                    | AA409008, AU019341, AW742602, HCDHsc, Schad                                     | Dehydrogenase |
| Hsd17b4  | Hydroxysteroid 17-beta dehydrogenase 4                                  |                                                                                 |               |
| Ipla2    | Phospholipase A2, group VI                                              | iPLA2, PNPLA9, BB112799, iPLA2beta, iPLA(2)beta                                 | Lipase        |
| Ltc4s    | Leukotriene C4 synthase                                                 |                                                                                 | Synthase      |
| Magl     | Monoglyceride lipase                                                    | Mgl, Magl, AA589436                                                             | Lipase        |
| Napepld  | N-acyl phosphatidylethanolamine phospholipase D                         | Mbldc1, NAPE-PLD, A530089G06                                                    |               |
| Nat1     | N-acetyltransferase 1                                                   | Nat-1                                                                           | Transferase   |
| Nat2     | N-acetyltransferase 2                                                   | Nat2a                                                                           |               |
| Pcx      | Pyruvate carboxylase                                                    | Pc, Pcb                                                                         | Carboxylase   |
| Pcyt1a   | Phosphate cytidylyltransferase 1, choline, alpha isoform                | CTalpha, Cctalpha, Ctpct, Ctalpha                                               | Transferase   |
| Pcyt1b   | Phosphate cytidylyltransferase 1, choline, beta isoform                 | AW045697, CTTbeta                                                               |               |
| Pcyt2    | Phosphate cytidylyltransferase 2, ethanolamine                          | 1110033E03Rik, ET                                                               |               |
| Pla1a    | Phospholipase A1 member A                                               | Pspla1, Ps-pla1, AA986889                                                       | Lipase        |
| Plcb1    | Phospholipase C, beta 1                                                 | Plcb, A1132408, mKIAA0581, 3110043I21Rik                                        |               |
| Plcb2    | Phospholipase C, beta 2                                                 | AI550384, B230399N12, B230205M18Rik                                             |               |
| Plcb3    | Phospholipase C, beta 3                                                 | mKIAA4098                                                                       |               |
| Plpp1    | Phospholipid phosphatase 1                                              | LPP1, mPAP, Hic53, LPP-1, PAP2a, Hpic53, PAP-2a, Ppap2a, PAP2-alpha             | Phosphatase   |
| Ppara    | Peroxisome proliferator activated receptor alpha                        | 4933429D07Rik, AW742785, Nr1c1, PPAR-alpha, PPARalpha, Ppar                     | Receptor      |
| Ppard    | Peroxisome proliferator activated receptor delta                        | NUC-1, NUC1, Nr1c2, PPAR-beta, PPAR-delta, PPAR[b], PPARdelta, Pparb, Pparb/d   |               |
| Ppargc1a | Peroxisome proliferative activated receptor, gamma, coactivator 1 alpha | A830037N07Rik, Gm11133, PGC-1, PPARGC-1-alpha, Pgc-1alpha, Pgc1, Pgco1, Ppargc1 |               |
| Ppargc1b | Peroxisome proliferative activated receptor, gamma, coactivator 1 beta  | 4631412G21Rik, PGC-1beta, PGC-1beta/ERRL1, PPARGC-1-beta, Perc                  |               |
| Pparg    | Peroxisome proliferator activated receptor gamma                        | Nr1c3, PPAR-gamma, PPAR-gamma2, PPARgamma, PPARgamma2                           |               |
| Ptafr    | Platelet-activating factor receptor                                     | PAFR                                                                            |               |
| Ptgd2    | Hematopoietic prostaglandin D synthase                                  | Hpgds                                                                           | Synthase      |
| Ptger1   | Prostaglandin E receptor 1                                              | EP1, Ptgerep1                                                                   | Receptor      |
| Ptger3   | Prostaglandin E receptor 3                                              | EP3, Pgerep3, Ptgerep3                                                          |               |
| Ptger4   | Prostaglandin E receptor 4                                              | EP4, Ptger, Ptgerep4                                                            |               |
| Ptges    | Prostaglandin E synthase                                                | 2410099E23Rik, D2Ert369e, Pges, mPGES, mPGES-1                                  | Synthase      |
| Ptgfr    | Prostaglandin F receptor                                                | AI957154, PGF, fp                                                               | Receptor      |
| Ptgis    | Prostaglandin I2 (prostacyclin) synthase                                | Cyp8, Cyp8a1, Pgis                                                              | Synthase      |
| Ptgs1    | Prostaglandin-endoperoxide synthase 1                                   | COX1, Cox-1, Cox-3, PGHS-1, PHS 1, Pggs1                                        |               |
| Ptgs2    | Prostaglandin-endoperoxide synthase 2                                   | COX2, Cox-2, PES-2, PGHS-2, PHS II, PHS-2, Pggs2, TIS10, gripghs                |               |
| Rara     | Retinoic acid receptor, alpha                                           | Nr1b1, RAR, RARalpha1                                                           | Receptor      |
| RnaseP   | Ribonuclease P                                                          |                                                                                 | Nuclease      |
| Rxra     | Retinoid X receptor alpha                                               | 9530071D11Rik, Nr2b1, RXRalpha1                                                 | Receptor      |
| Rxrb     | Retinoid X receptor beta                                                | AL023085, H-2RIIBP, Nr2b2, RCoR-1, Rub                                          |               |
| Rxrg     | Retinoid X receptor gamma                                               | Nr2b3                                                                           |               |
| Scd1     | Stearoyl-Coenzyme A desaturase 1                                        | AA589638, AI265570, Scd, Scd-1, ab                                              | Desaturase    |
| Sirt1    | Sirtuin 1                                                               | AA673258, SIR2L1, Sir2, Sir2a, Sir2alpha                                        | Regulator     |

|          |                                     |                                                               |             |
|----------|-------------------------------------|---------------------------------------------------------------|-------------|
| Slc2a1   | Solute carrier family 2, member 1   | Glut1, Glut-1, M100200, Rgsc200                               | Transporter |
| Slc2a3   | Solute carrier family 2, member 3   | Glut3, C78366, Glut-3, AA408729, AL023014, AL024341, AU040424 |             |
| Slc2a5   | Solute carrier family 2, member 5   | Glut5, Slc5a, AI526984                                        |             |
| Slc25a20 | Solute carrier family 25, member 20 | CAC, Cact, mCAC, C78826, 1110007P09Rik                        | Carrier     |
| Slc27a1  | Solute carrier family 27, member 1  | Fatp, FATP1                                                   |             |
| Slc27a3  | Solute carrier family 27, member 3  | FATP3, Acsvl3, FATP-3, Vlcs-3                                 |             |
| Slc27a4  | Solute carrier family 27, member 4  | FATP4, ACSVL4, BB144259                                       |             |
| Tbx2r    | Thromboxane A2 receptor             | TP, TXAR-2                                                    | Receptor    |
| Tbxas1   | Thromboxane A synthase 1            | CYP5, TS, TXS, THAS, CYP5A1                                   | Synthase    |

**Table S3:** Gene names and forward/reverse primer sequences used in the present study.

| Gene    | Forward primer sequence | Reverse primer sequence |
|---------|-------------------------|-------------------------|
| Alox5   | TTCCCATTTGCCATCCAGCTC   | TGGAAGTCACTGGAACGCAC    |
| Alox8   | TGGCCACATTACGTCAGCTG    | GCGTGTGATGTGCAGTGTG     |
| Alox15  | GCTGTTGCCACCATGAGATG    | AACGGATGTGTGGAACGAGG    |
| Abhd4   | TTCCGTCCAGACTTCAAGCG    | GCTTTGAATGCCGTTTCCCC    |
| Abhd6   | TTGCGTCTTTCCTCCTGTGG    | AACCTGCATGCCCAGTGTCC    |
| Abhd12  | TGTCTGGTGAAGAATGCCC     | TTGTACAGCTCCACACGGTG    |
| Acaa1a  | AAAGCCAGAGACTGCCTGAC    | CTGCCGTGAAATGCCAAACC    |
| Acaca   | ATGACGGCAGCAGTTACACC    | AGACGGTGAGCGCATTACAG    |
| Acadl   | GCTGAGTTGGCGATTTCTGC    | TGCTGCACCGTCTGTATGTG    |
| Acadv1  | TTTGGCCTGCAAGTACCCAG    | TCTGCCAAGCGAGCATACTG    |
| Acat1   | TCAGTGTGGTTGTGCTAGCC    | AACAACAATCCGGGCTCCAG    |
| Acox1   | TCACTCGAAGCCAGCGTTAC    | TTGAGGCCAACAGGTTCCAC    |
| Acs1l   | AAACTTGGGAAGGAAGCCGG    | TTGGAGTCAGAAGGCCGTTG    |
| Actb    | TACAATGAGCTGCGTGTGGC    | ACATGGCTGGGGTGTGTAAG    |
| Apidor1 | ATTCTTGAGCGCTTCTTCCC    | GAAGTGGACGAAAGCTGCTG    |
| Adipor2 | ATCCCTGAGCGCTTCTTTCC    | TGCAGGTTTGAGACTCCGTG    |
| Apoe    | TGCGAAGATGAAGGCTCTGTG   | GGTTGGTTGCTTTGCCACTC    |
| Cnr1    | CCTGGGAAGTGTCTCTTTGTCT  | GGTAACCCCAACCCAGTTTGA   |
| Cnr2    | AAACAATGTCTCCAGGGCC     | TGGGAGCCAGAAGTCACATG    |
| Cd36    | TCCCTTGATTCTGCTGCACG    | AGCCAGGACTGCACCAATAAC   |
| Cmklr1  | AGTCACGCGCAGTAACAGAC    | TCGTTGTAAGCGTCGTACTCC   |
| Cpla2   | AAAGTACAAGGCCCCAGGTG    | AATGGCGATTCCGGGTCATC    |
| Cs      | ACTCAATTACAGGACGGGTGG   | AGCAAACCTCTCGCTGACAGG   |
| Cyp27a1 | TCGGAGGATTGCAGAAGTGG    | ATGCAGCCTCACCTTCTTGC    |
| Dagla   | TCTGCGGACTTACAACCTGC    | ACACTTTTAGACGGCGGGAC    |
| Elovl1  | AAGAAGGACGGGCAAGTGAC    | ATCATGGCATGGAAGGAGCC    |
| Elovl2  | ATGTCTATCACCACGCGTCC    | ACTTGTGCATGGACGGGAAC    |
| Elovl4  | AAACGTGTAGCAGACTGGCC    | CTAAGCGCATTTGGAACGGC    |
| Elovl5  | TACATGAAGAACCGGCAGCC    | TTTGCCTTCCCACACACCTG    |
| Enpp2   | AGCATTACAGGGCAAGCAGAG   | AGCAGAGATTGACGCCGATG    |
| Faah    | CTTTGTGCACACCAACGTCC    | TTCCACGGGTTTCATGGTCTG   |
| Fapb7   | AGGAAGGTGGCAAAGTGGTG    | AGCTTGTCTCCATCCAACCG    |
| Fads1   | GCAACGTTACCAATCAGCC     | TACTTGGCGCACAGGGATTG    |
| Fads2   | GCATGTGTTTGTCTTGGCG     | TCATGCTGGTGGTTGTAGGG    |
| Fasn    | CCAAGCGGCCATTTCCATTG    | TGTCCCTCGAGTTGGCAAAG    |
| Fpr2    | GGACCGCTGCATTTGTGTTC    | AAATCCAGGGCCCAACAACC    |
| Gapdh   | TGAACGGATTGGCCGTATTG    | CGTTGAATTTGCCGTGAGTG    |
| Gnpat   | TCACTGCGTTCTCTAGCTGC    | AAAGGCTTGCACGTCCTCAG    |
| Gpr18   | GCGTTGTGGGTTTTCAAGCTG   | ACGAGGTCCAGTAGTGCAAC    |
| Gpr31b  | AGTGTGTGCTGGGCCTTATG    | GCAGCAAAGAATGGCAGACTG   |
| Gpr55   | TATTCACATCCTGCTGCGCC    | AATGGTCCAGATGCAGGCTC    |
| Hadh    | AAACACCGATGACCAGCCAG    | ATGGCACCAAGAGTCGGTTC    |
| Hsd17b4 | CTTCAGCAATGCCAGCAAGC    | AGCACCAACGAATCCTGACG    |

|          |                       |                       |
|----------|-----------------------|-----------------------|
| Ipla2    | ACTCCATTGGGCCAAGAACG  | AGCAGCACCATGACACAGTC  |
| Ltc4s    | TCTCTGCACGAAGGGCTTTC  | TTCGTGGAAGAAGATGCCGG  |
| Magl     | TGCTGTCTCGGAACAAGTCG  | ATTGCTCGCTCCACTCTTGC  |
| Napepld  | ACTGCCCCGCTTTTGAAGAG  | TCTTCTGGGTCTGCATGCTG  |
| Nat1     | ATCATCTGCTGTACTGGGCTC | TTCCTGTCACTGATGGTCACC |
| Nat2     | GTTGATGCTGGGTTTGGACG  | TCAAACGGAAGATGGCAGGC  |
| Pex      | TCCGGTTCATTGGTCCAAGC  | TTGGAGAACTCATGCGCCTC  |
| Peyt1a   | CCGGATTGATTTTGTGCCCC  | CAAACATGCCTGCGTCCTTG  |
| Peyt1b   | TGGCTTCTGACATGCTGTGG  | ACAACCCACCAGTGTAACCG  |
| Peyt2    | TTTGCTTCTGGGAAGGAGCC  | TGGAACAGGTCAAAGGCACC  |
| Plal1a   | TGGATGCCCTGCCTTCTTTC  | ATCAGTGGGCAGGTGTTCTC  |
| Plcb1    | AGTAGAGGCGCAAACCATCG  | TGTAATTGGTCGTGTGCTCC  |
| Plcb2    | TCCTGCTGATCGAAAACGGG  | ATCTCGTCGATTTCTGGCCG  |
| Plcb3    | CAACCAACCTTTGTGCCTGC  | AGGCTTACGTGCTTGATGGG  |
| Plpp1    | AAGTCAAGGAGGGCAGGTTG  | GCGACAAACAGCATGCAGTAC |
| Ppara    | ATGAACAAGGTCAAGGCCCG  | AAGCGTCTTCTCGGCCATAC  |
| Ppard    | ACGCACCCTTTGTCATCCAC  | TCACCAGCTGTTTCCACACC  |
| Ppargc1a | ACTACAGACACCGCACACAC  | AGCCTTTCGTGCTCATAGGC  |
| Ppargc1b | TCAGTTCCAGAAGTCAGCGG  | ATGCAGTTCCGTACAAGGCC  |
| Pparg    | TCAGAAGTGCCTTGCTGTGG  | ACAGCTTCTCCTTCTCGGC   |
| Ptafr    | TCATCATCCACACGCTGCTC  | TGAATACCGCCAAGACCGTG  |
| Ptgd2    | TGCTGTGGATGGGTTTGGTC  | GAAAGTTGGGCTGCACTGTG  |
| Ptger1   | TGCCACCTTCTGTGTTCG    | AAGAAGACCATGCAGCCACC  |
| Ptger3   | ACCATCAAAGCCCTGGTGTC  | AGACGGACAGCACACACATG  |
| Ptger4   | ATCGAACCGTGAGCTCCAAC  | ATCACTGCGGGAATGGTCAC  |
| Ptges    | ATCAAGATGTACGCGGTGGC  | ATCCTCGGGGTTGGCAAAAG  |
| Ptgfr    | TCTTCTGCTCCGGACACAAC  | AGACACTGGCTGCTTGGAAC  |
| Ptgis    | TGCCTTGAGTTTGGGAGAG   | AACAGTGACGTATCTGCCCC  |
| Ptgs1    | ATCACCTGCGGCTCTTCAAG  | ATCAACACGGACGCCTGTTC  |
| Ptgs2    | AGGAACTCAGCACTGCATCC  | TCCCCACGGTTTTGACATGG  |
| Rara     | AATGTTTTCGACGTGGGCATG | TTCTCAATGAGCTCGCCAC   |
| Rxra     | TACGTGGAGGCAAACATGGG  | AGGGGCAGCTCAGAAAAGTG  |
| Rxrb     | ACGGGTCTTCATGTGCACAG  | TGTCCATCCTCATGTACGC   |
| Rxrg     | AGTAGCCACGAAGACATGCC  | TCTCCACGTTTCATGTACCG  |
| Scd1     | AGGGCGGAAAACCTGGACATG | TACAAAAGTCTCGCCCCAGC  |
| Sirt1    | TCATGGTTCCTTTGCAACAGC | GGCTTCATGATGGCAAGTGG  |
| Slc2a1   | TGCTGTGCTCATGACCATCG  | AAGATGGCCACGATGCTCAG  |
| Slc2a3   | TGGCTGGCTGTTGTAAGTGG  | AGATGAGGAAGGCAGCGAAG  |
| Slc2a5   | TGATTGTCCTCATGGCTGGC  | ATGAACACATTGACGGCCCC  |
| Slc25a20 | ATGCGAGATGTTCTTGCCAG  | AAGATCCCTGCAAAGCCACC  |
| Slc27a1  | TGTGCTCTATGACTGCCTGC  | ACTTCTTGCGCAGTACCACC  |
| Slc27a3  | AGAACTTGCCACCGTATGCC  | TGGCCATCCTAACCTTCTGC  |
| Slc27a4  | AGTACATTGGCGAGCTCTGC  | TGTGGAAACGGCTGGAGAAG  |
| Tbax2r   | TGCTCATCTACCTGCGTGTG  | TGGAGCTGTGAACTGAACCG  |
| Tbxas1   | TGCCGTATCTGGACATGGTG  | TCCCGTGTGAACCTGAAAGC  |

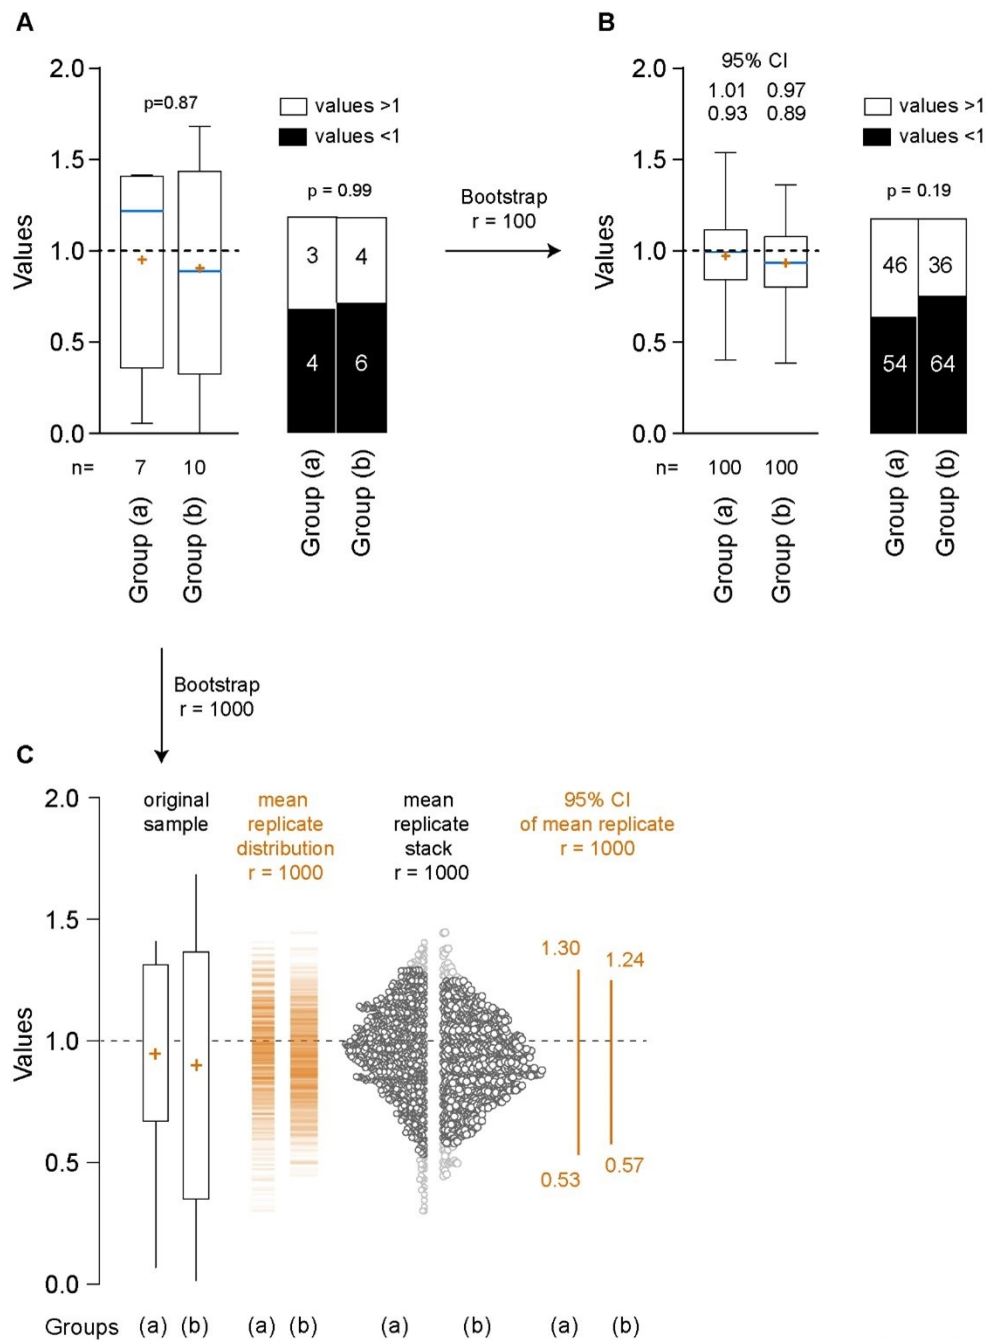

**Figure S1.** Bootstrap resampling of group mean. (A) Based on our previous results obtained in Figure 4A, we generated bootstrapped values, using input parameters matched to the in vivo measurements (identical means and standard deviations). Subsequent random sampling with 7 and 10 measures were then performed to yield newly-generated samples ( $n=7$  and  $n=10$  in groups a and b, respectively). These generated values presented similar distributions than what was observed before (Figure 4A), thus validating the present resampling technique. Note that the distribution of values below ( $<1$ ) or above ( $>1$ ) threshold are not significantly different in the two groups (a and b,  $p=0.99$ ). (B) We controlled and confirmed that such a resampling technique with 100 random measurements ( $r=100$ ) does not reach statistical significance *per se*. Note how mean values (orange crosses) are conserved throughout the resampling. 95% CI: 95% confidence intervals. Orange crosses represent group means while horizontal blue lines represent group median values. (C) Using the visual inference tool (VIT) from iNZight [87,88], we then ran extreme resampling ( $r=1000$ ) of the dataset presented in A. As expected, such a method produced greatly overlapping mean distributions (orange crosses and horizontal orange lines) and 95% CI. Faded circles are values outside of the 95% CI.

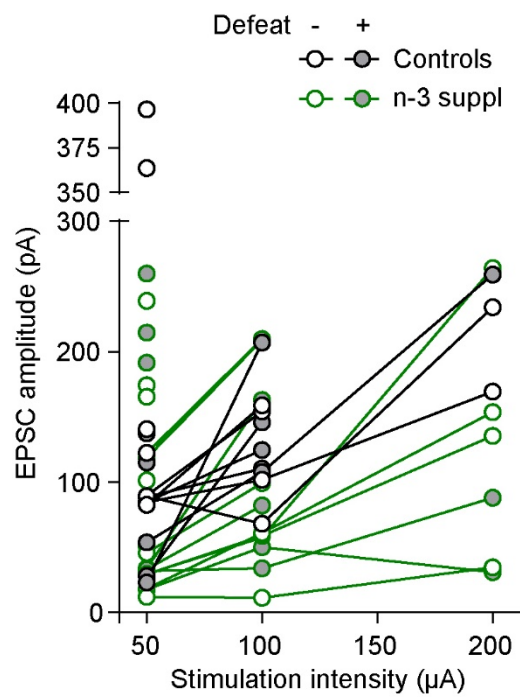

**Figure S2.** Input-output (stimulation intensity in relation to EPSC amplitude) relationships in the different groups.

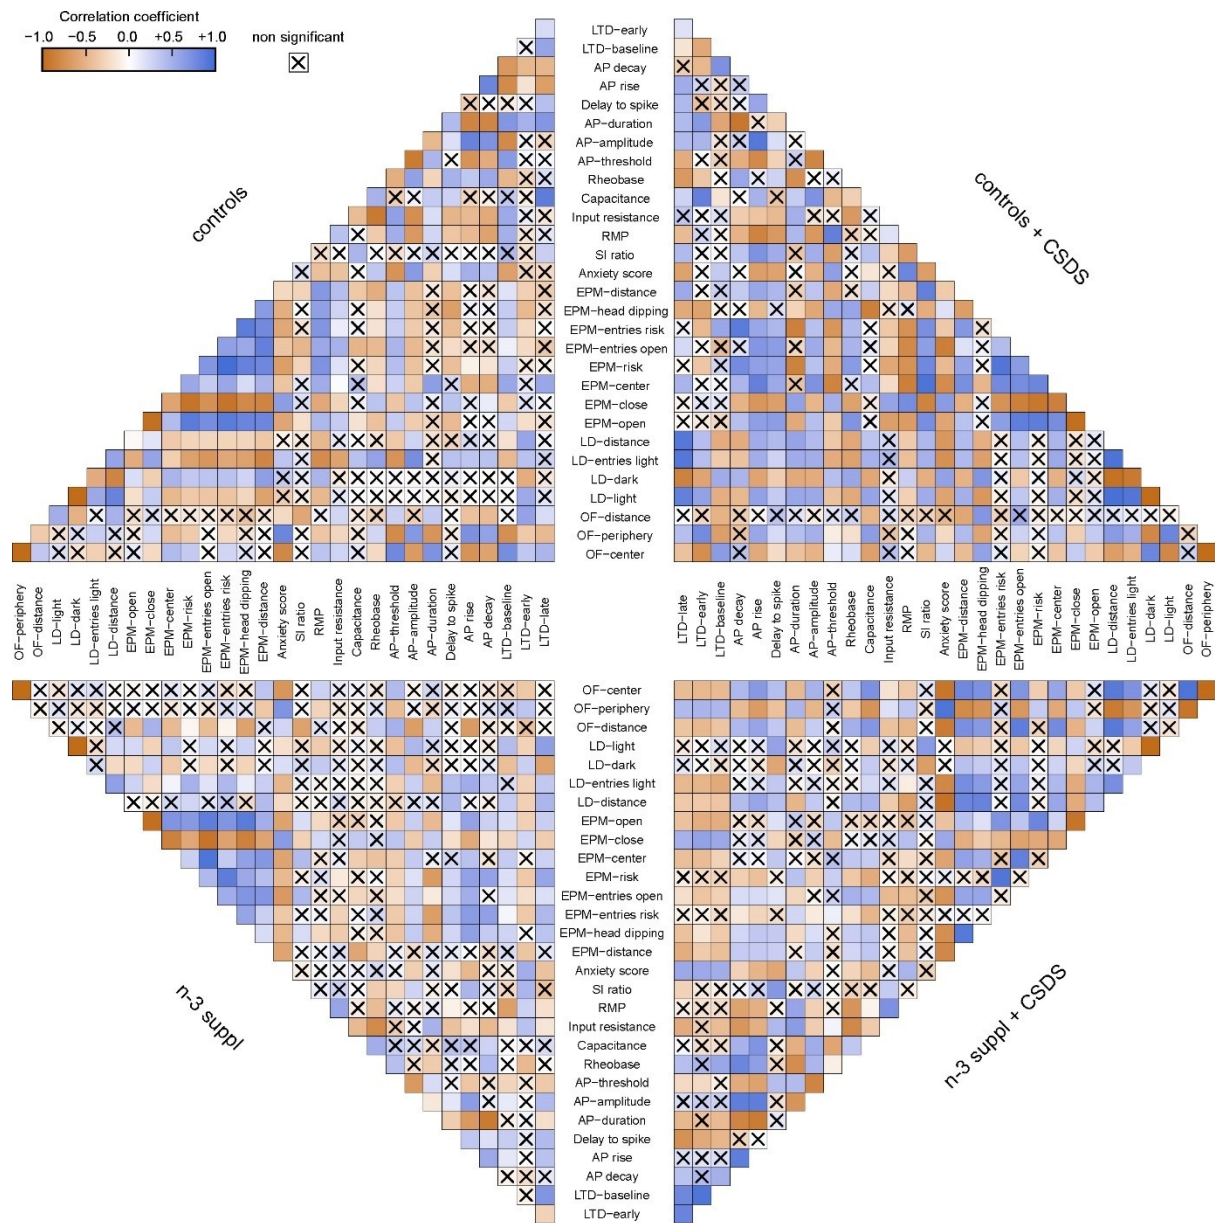

**Figure S3.** Correlation matrices between behavioral parameters of mice and electrophysiological properties of accumbal MSN. AP: action potential, CSDS: chronic social defeat stress, EPM: elevated plus maze test, LD: light-dark test, LTD: long-term depression OF: open field test, RMP: resting membrane potential, SI: social interaction.

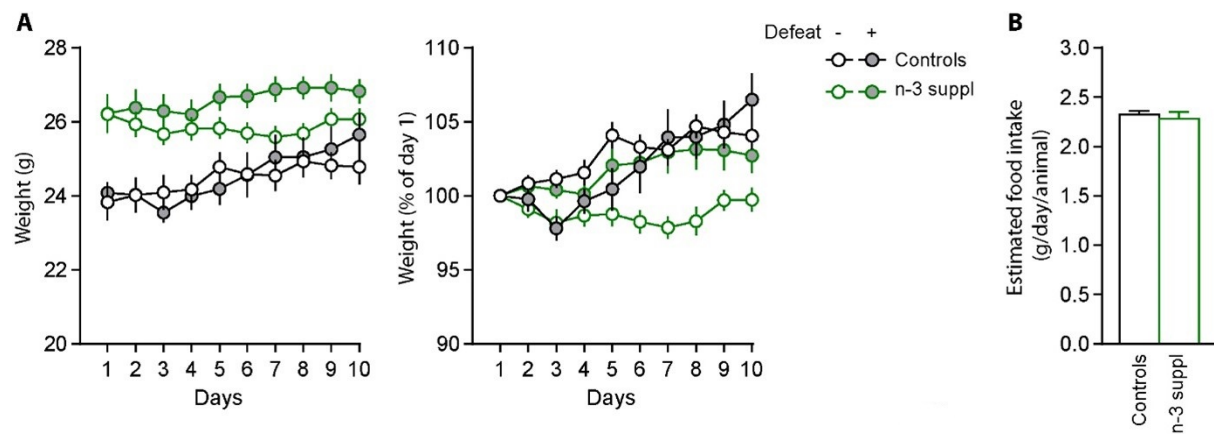

**Figure S4.** Animal body weight during CSDS and overall food intake. **(A)** Body weight of mice, expressed in g or % of the starting weight (day 1). **(B)** Food intake is similar in both diets ( $p = 0.61$ , unpaired t-test). Please refer to Supplemental Table 1 for statistical details.
